# Supplementary material
Source: PubMed Central journal article supplement (PMC3432434)

**A** GV sPLA<sub>2</sub> in apoE<sup>-/-</sup>AAA

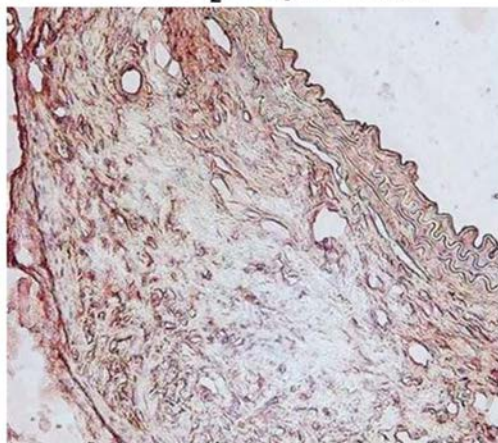

**B** GV sPLA<sub>2</sub> in GV DKO AAA

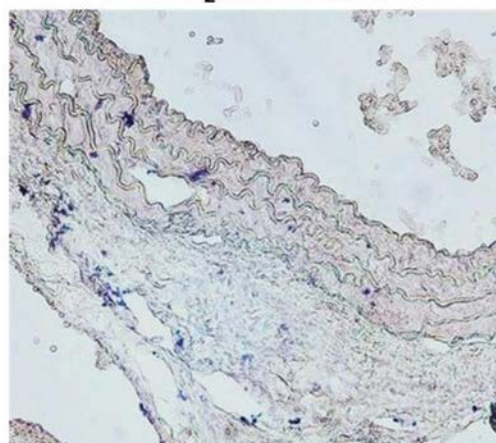

Supplement: mmc1.pdf [file mmc1.pdf]

**A** Macrophages in apoE<sup>-/-</sup> AAA

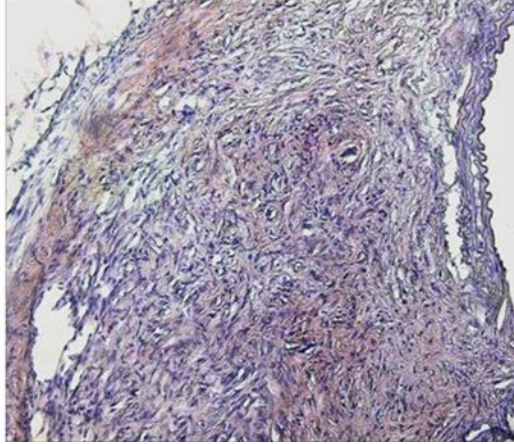

**B** GV sPLA<sub>2</sub> in apoE<sup>-/-</sup> AAA

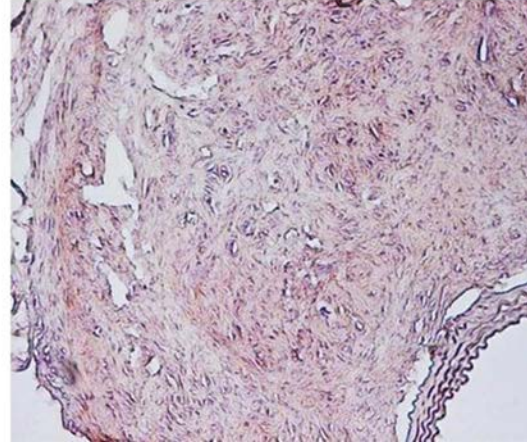

Supplement: mmc2.pdf [file mmc2.pdf]

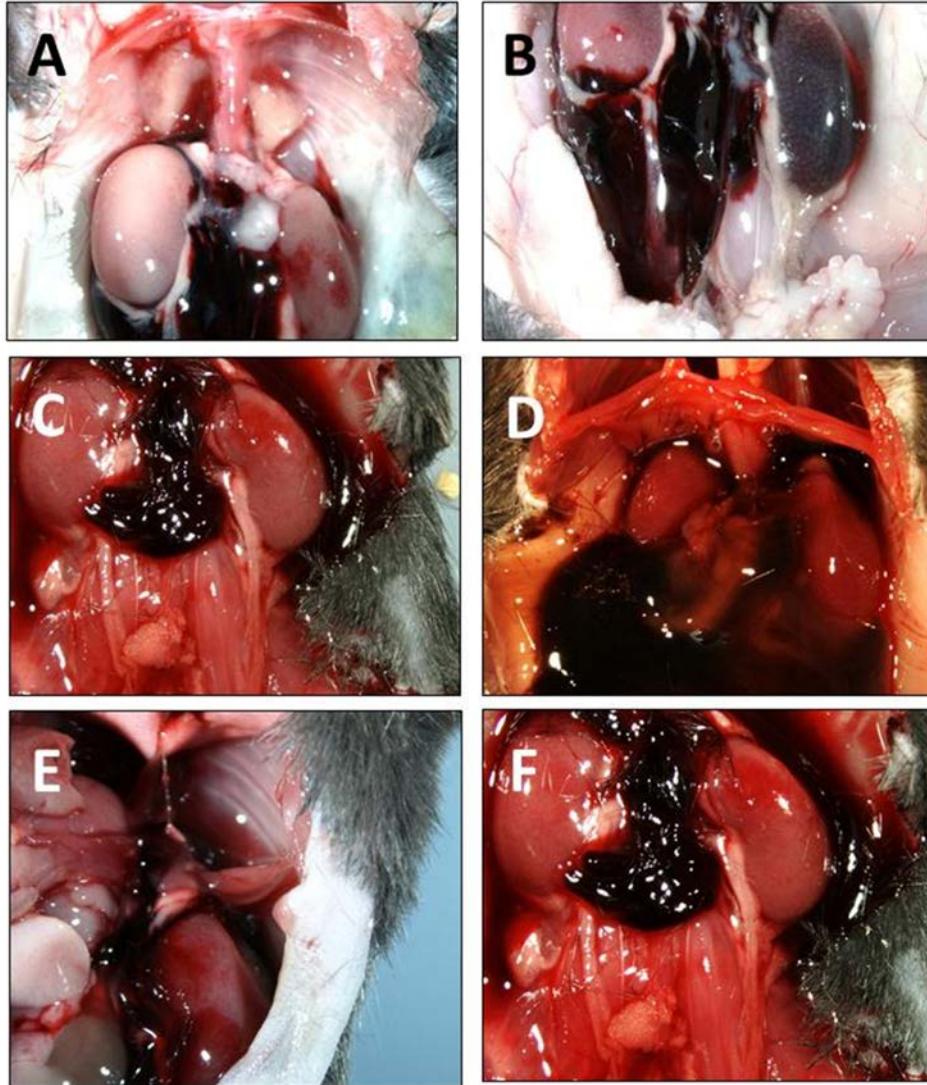

Supplemental Fig. S3

Supplement: mmc3.pdf [file mmc3.pdf]

**A** apoE<sup>-/-</sup> Ang II

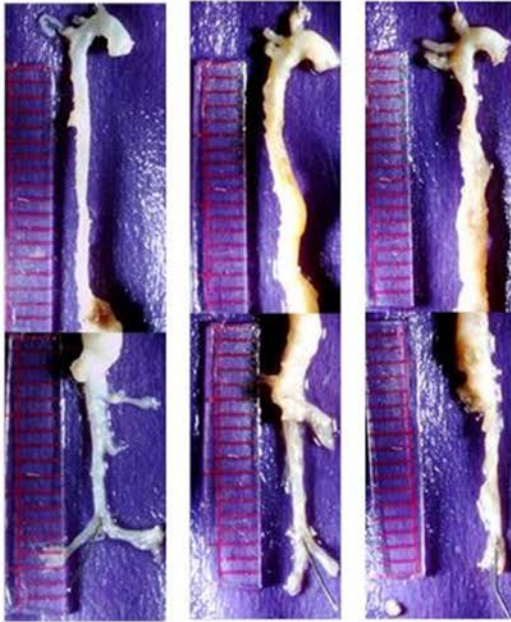

**B** GV DKO Ang II

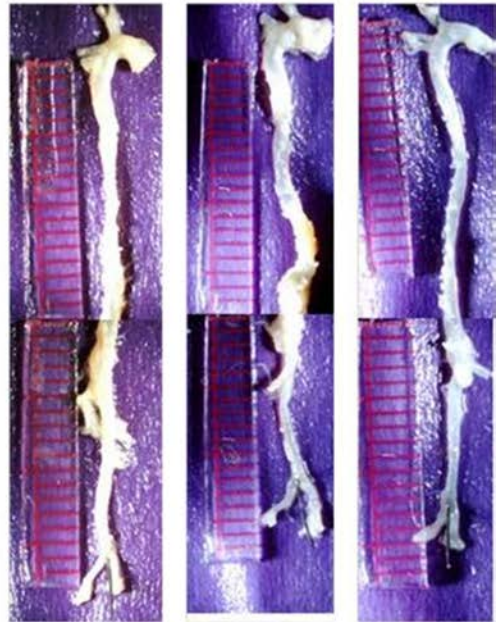

Supplement: mmc4.pdf [file mmc4.pdf]

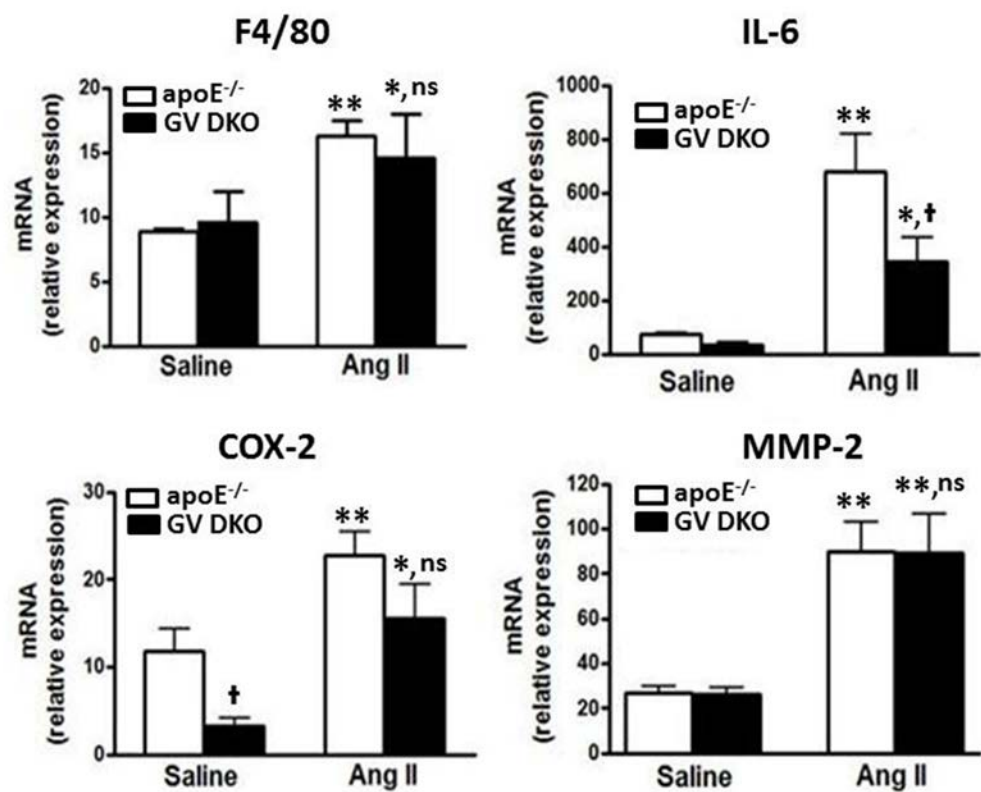

Supplemental Fig. S5

Supplement: mmc5.pdf [file mmc5.pdf]

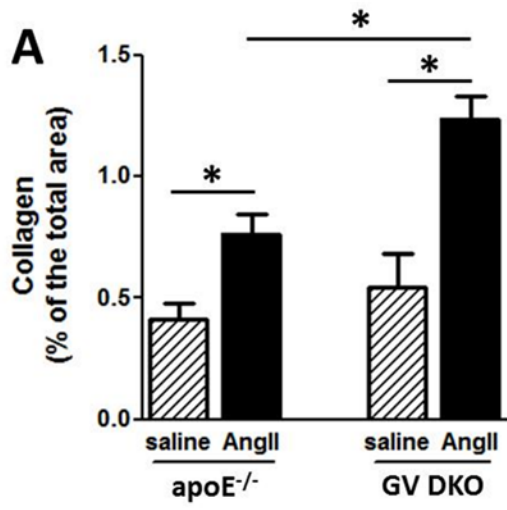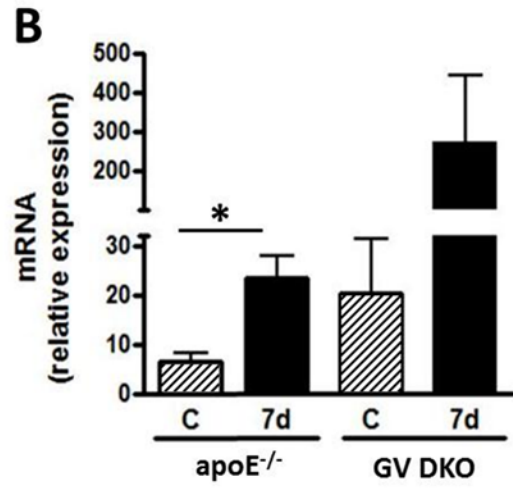

Supplement: mmc6.pdf [file mmc6.pdf]

**A**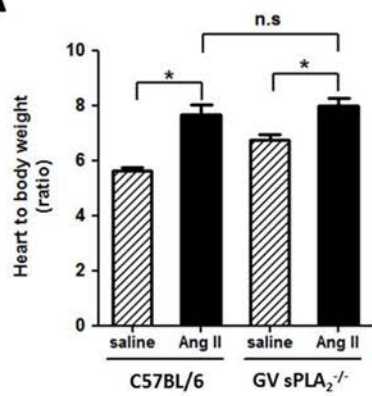**B**

C57BL/6 Ang II

GV sPLA<sub>2</sub><sup>-/-</sup> Ang II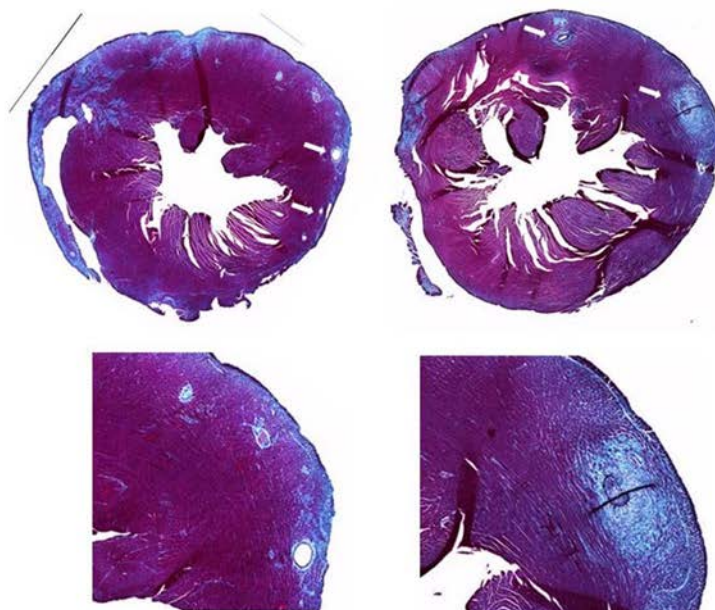

Supplement: mmc7.pdf [file mmc7.pdf]

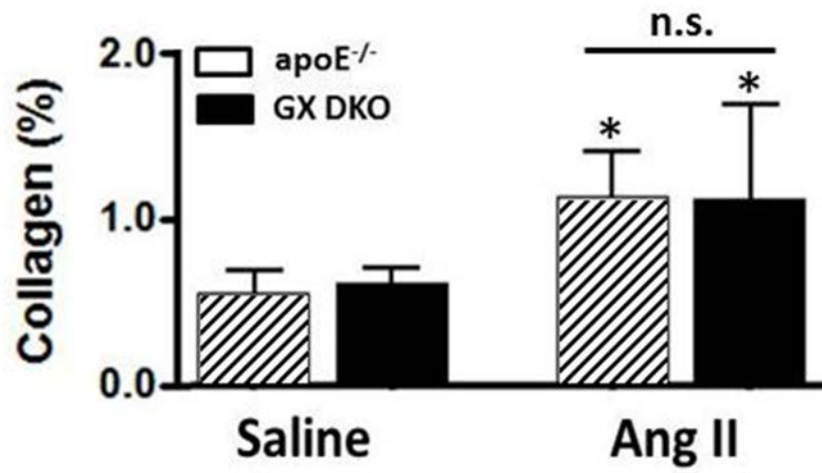

Supplement: mmc8.pdf [file mmc8.pdf]

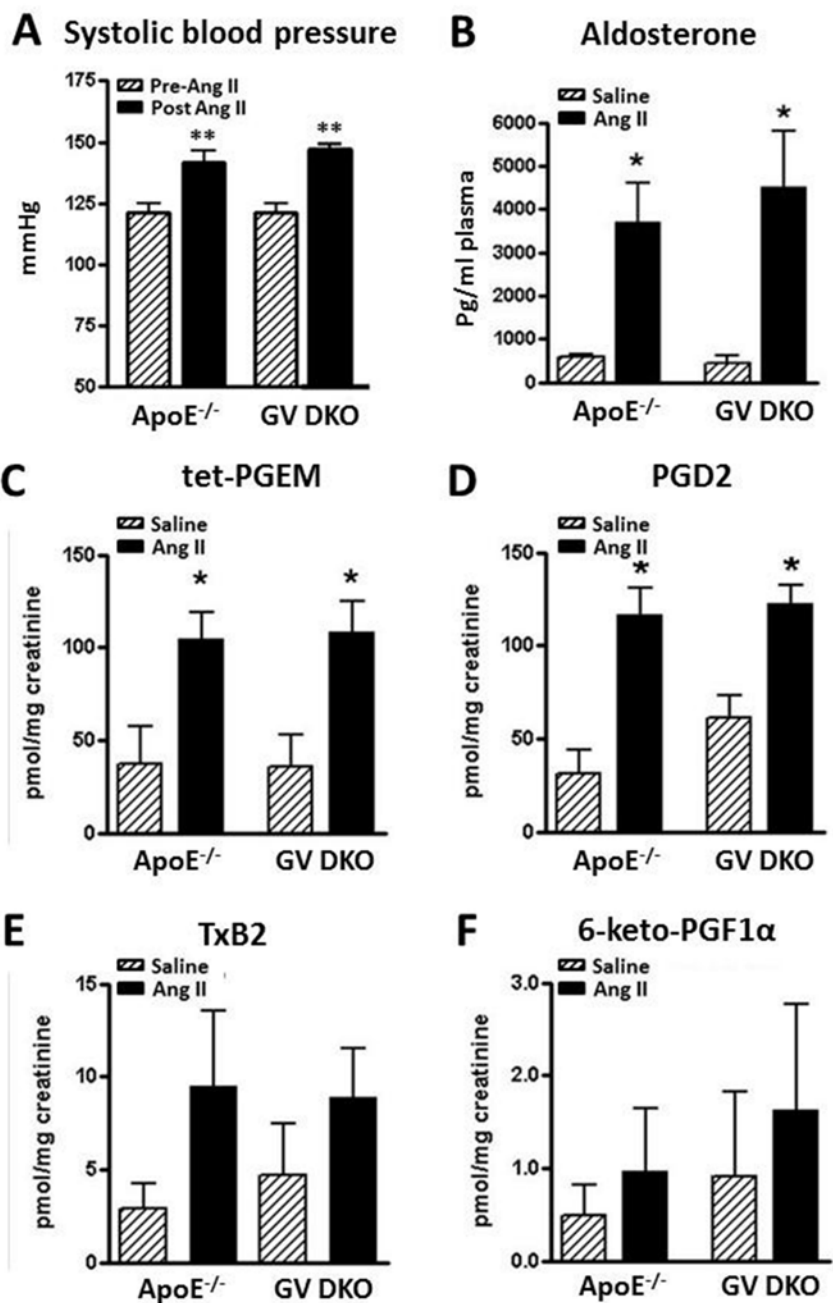

Supplemental Fig. S9

Supplement: mmc9.pdf [file mmc9.pdf]
